# Supplementary material
Source: PubMed Central journal article supplement (PMC4013005)
Supplement: NIHMS570019-supplement-Supplementary_Data.pdf [file NIHMS570019-supplement-Supplementary_Data.pdf]

Supporting Information

# Development of Hybrid Silver-Coated Gold Nanostars for Non-Aggregated Surface- Enhanced Raman Scattering

*Andrew M. Fales,<sup>†,‡</sup> Hsiangkuo Yuan,<sup>†,‡</sup> Tuan Vo-Dinh<sup>†,‡,§,\*</sup>*

*Fitzpatrick Institute for Photonics, Department of Biomedical Engineering, and  
Department of Chemistry, Duke University, Durham, North Carolina 27708, United  
States*

\* Phone: (919) 660-8520, Fax: (919) 613-9145, Email: [tuan.vodinh@duke.edu](mailto:tuan.vodinh@duke.edu)

† Fitzpatrick Institute for Photonics

‡ Department of Biomedical Engineering

§ Department of Chemistry

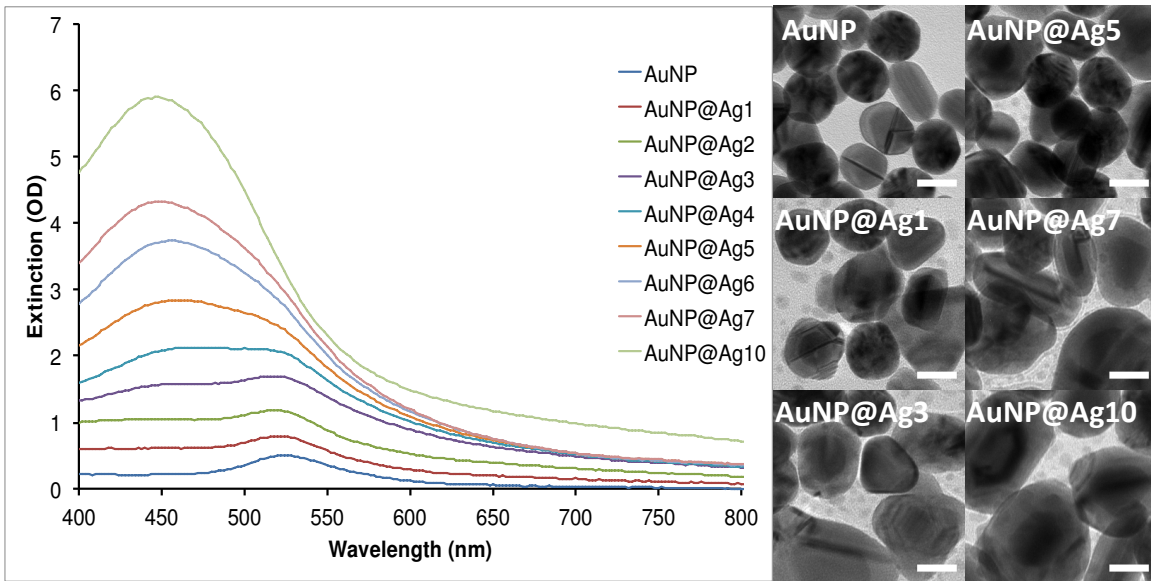

**Figure S1.** Extinction spectra and representative TEM images of gold nanospheres (AuNP) coated with various amounts of silver. Scale bars are 25 nm.

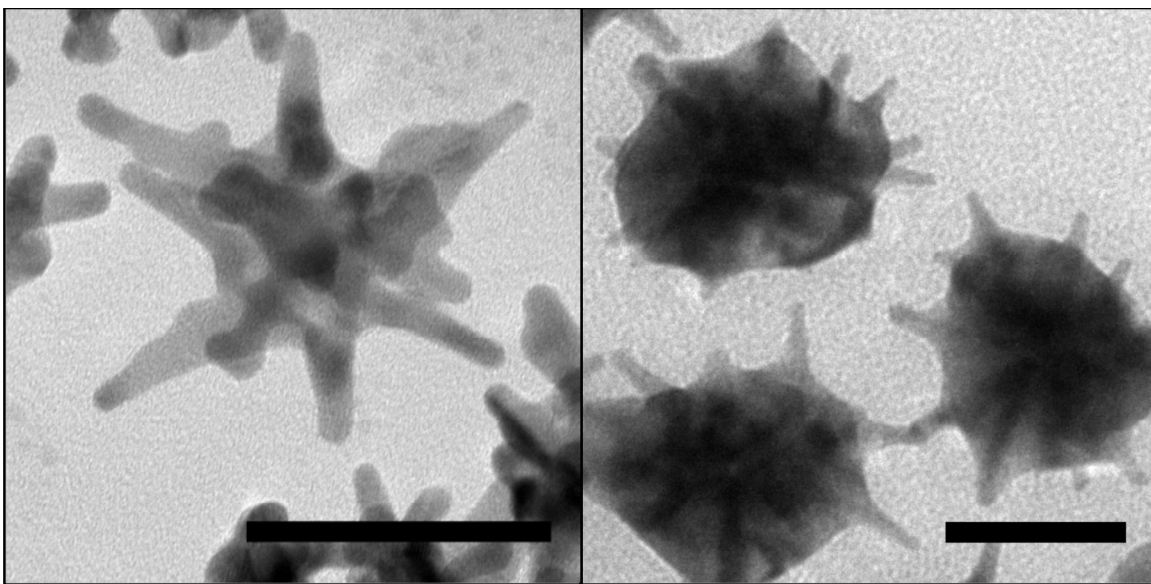

**Figure S2.** Magnified TEM views of uncoated S30 (left) and S30@Ag7 (right). Scale bars are 50 nm.

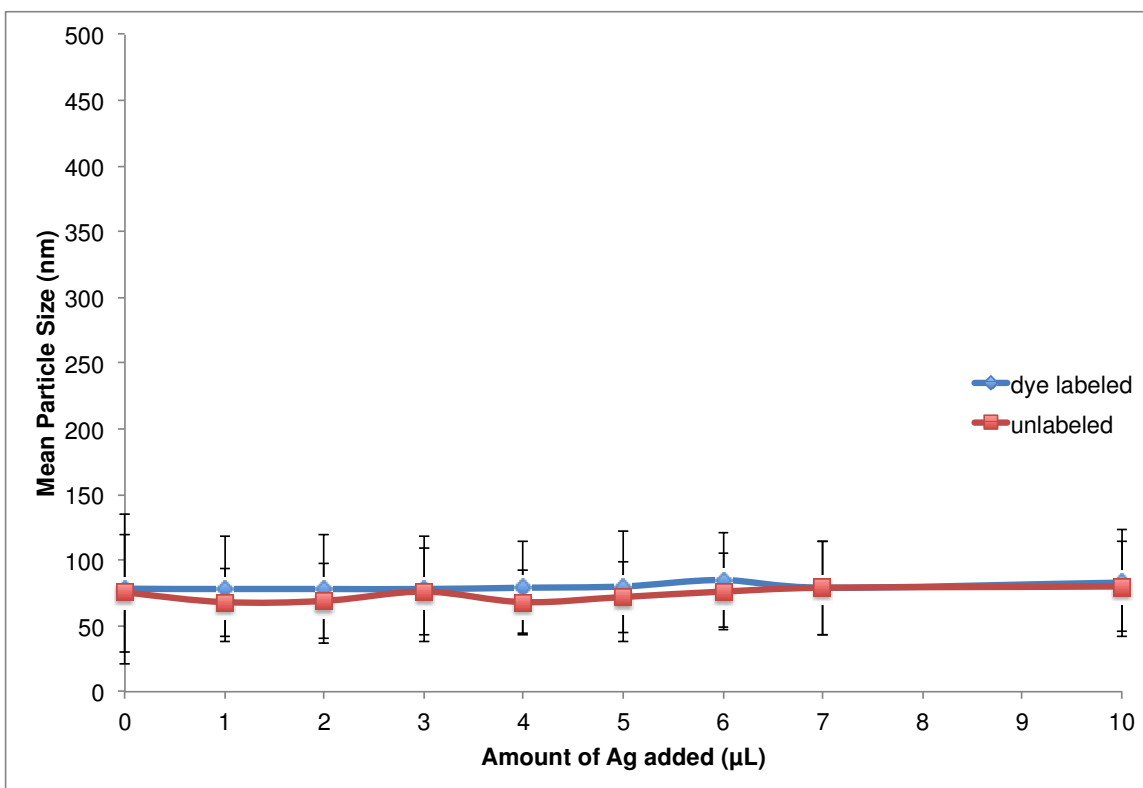

**Figure S3.** Mean hydrodynamic particle size measurements (determined by NTA) of S30 when coated with varying amounts of silver. No significant increase in size is observed after dye labeling, indicating that the particles remain in an unaggregated state.

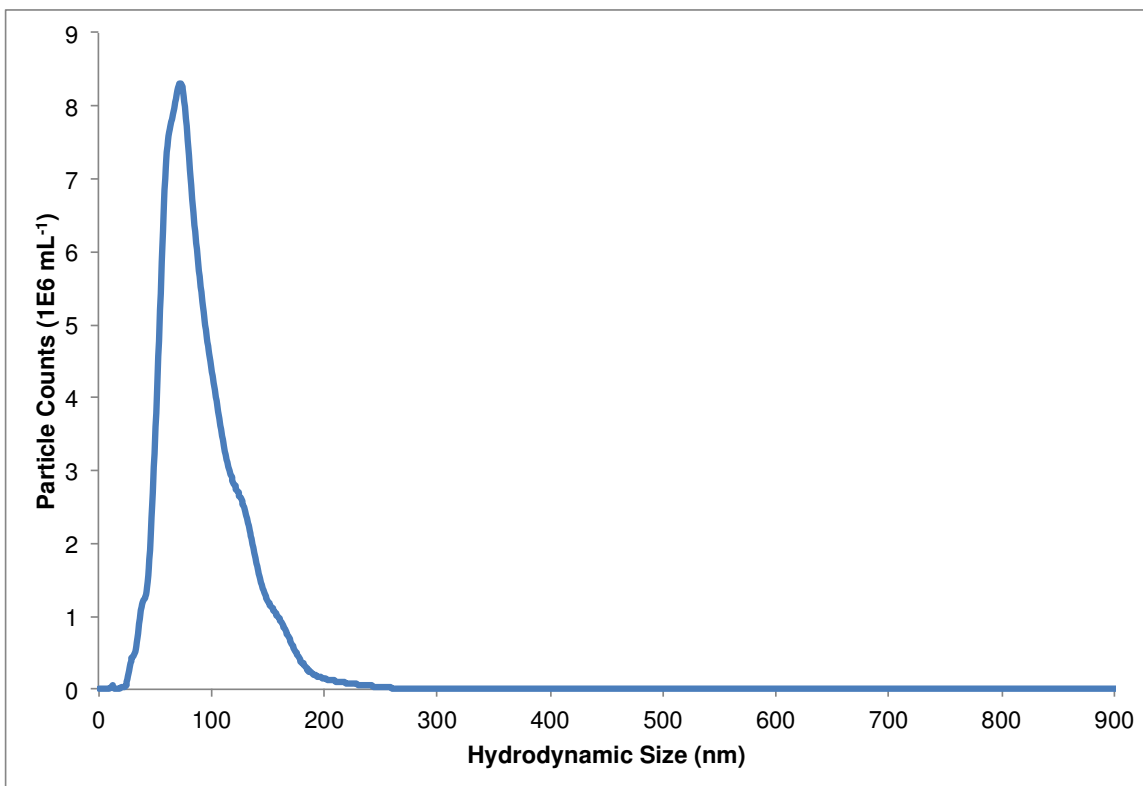

**Figure S4.** Particle size distribution for S30@Ag7-DTTC@SiO<sub>2</sub> as determined by NTA.

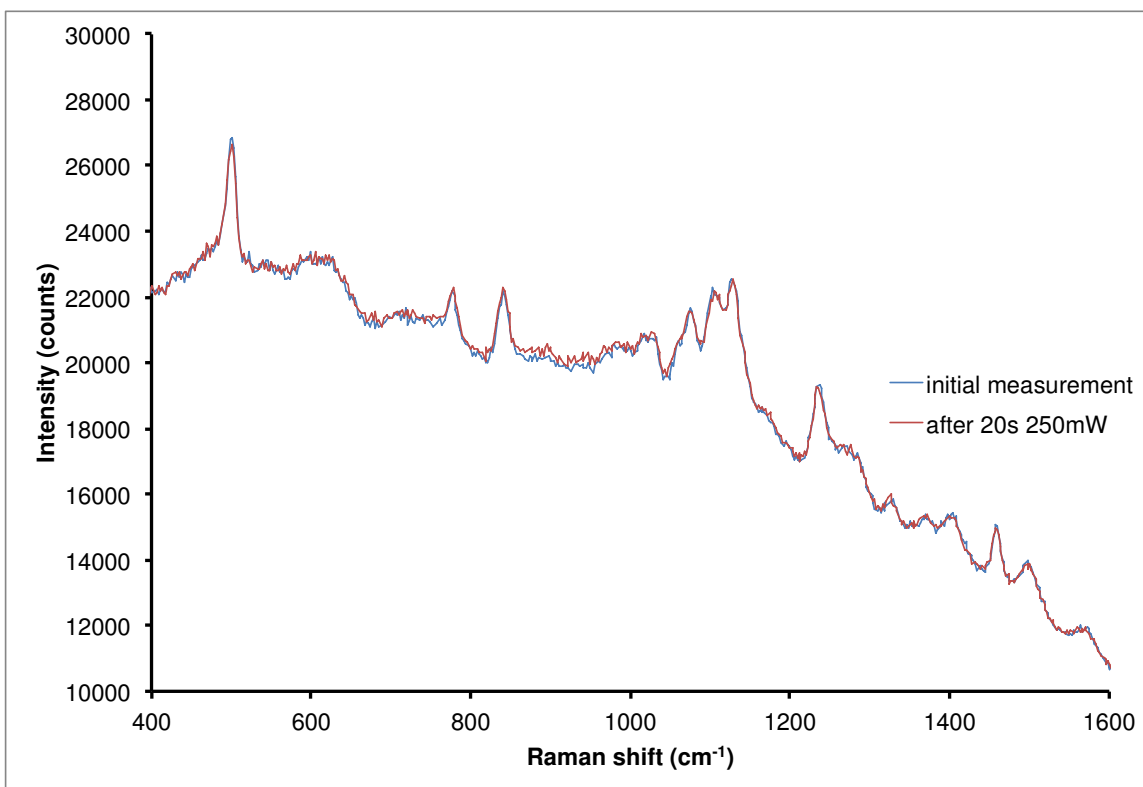

**Figure S5.** The DTTC spectrum from a 25  $\mu$ L solution of S30-DTDC@SiO<sub>2</sub> before and after exposure to 785 nm laser light (250 mW, 20 seconds). The spectra were collect with a 1 second exposure time.
